# Supplementary material
Source: PubMed Central journal article supplement (PMC3984932)
Supplement: NIHMS568017-supplement-supplement_1.pdf [file NIHMS568017-supplement-supplement_1.pdf]

# Figure-1 (Han)

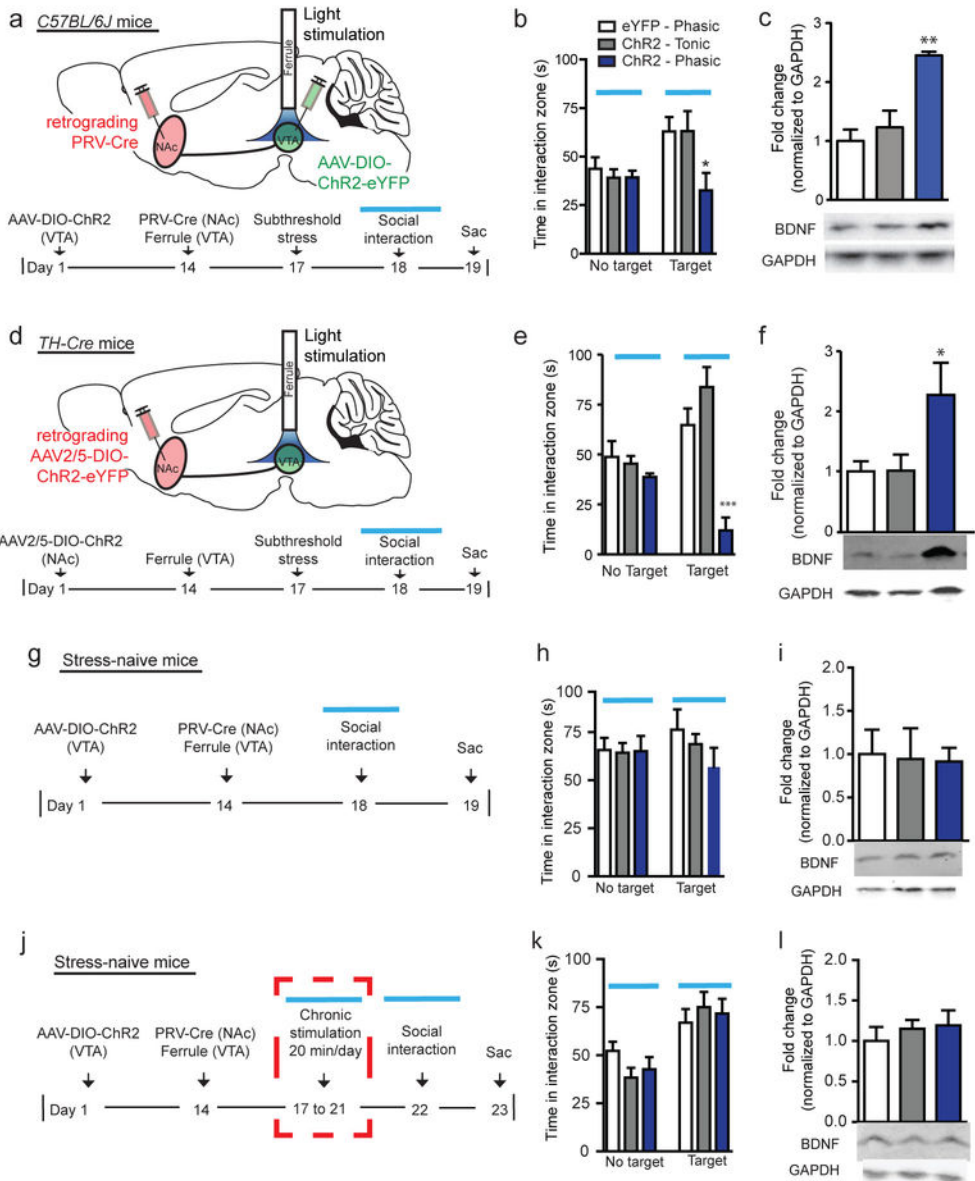

# Figure-2 (Han)

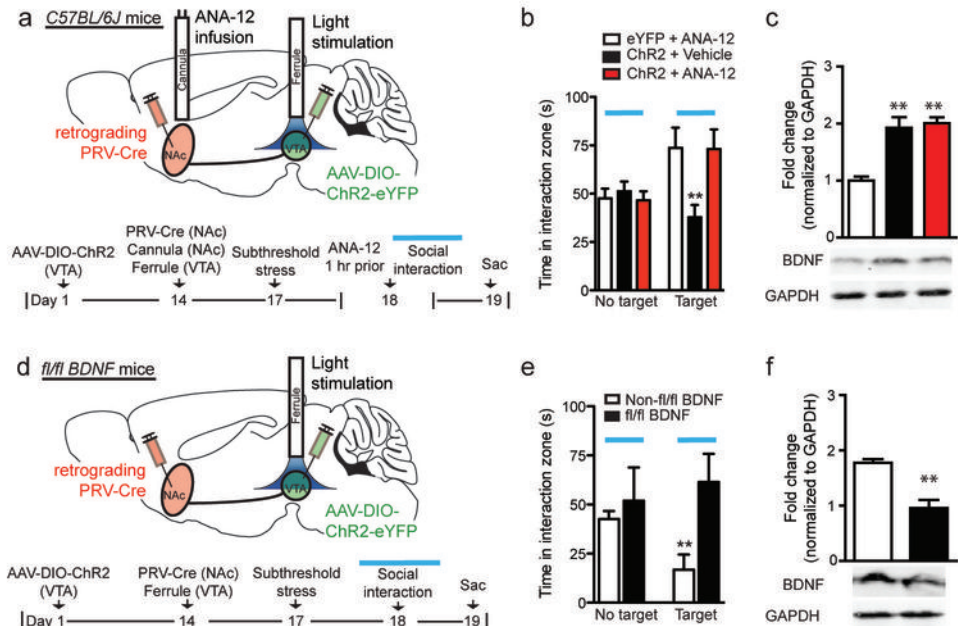

# Figure-3 (Han)

## a C57BL/6J - stressed mice

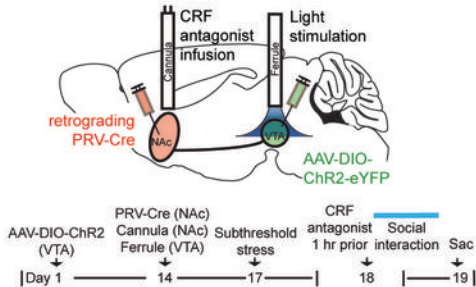

## b

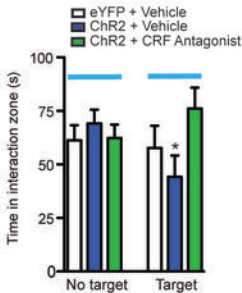

## c

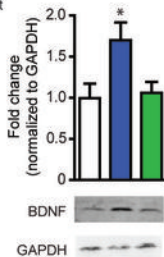

## d C57BL/6J - stress-naive mice

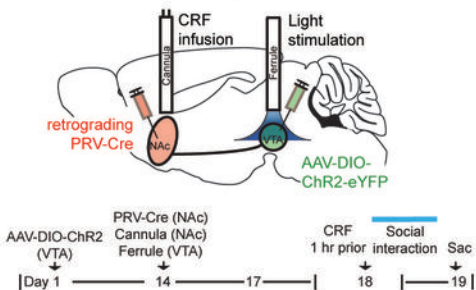

## e

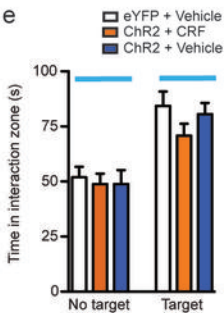

## f

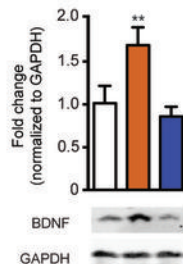

## g C57BL/6J - stress-naive mice

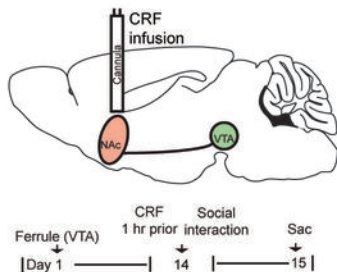

## h

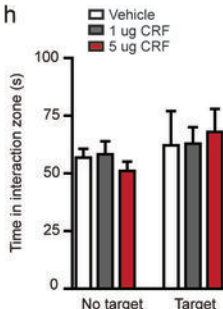

## i

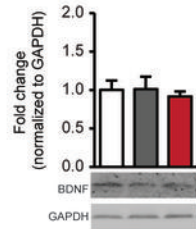

# Supplemental Figure-1 (Han)

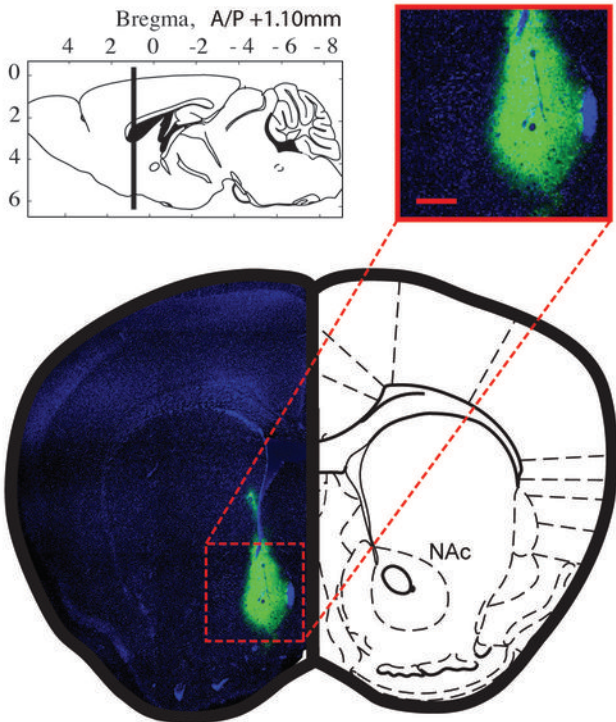

# Supplemental Figure-2 (Han)

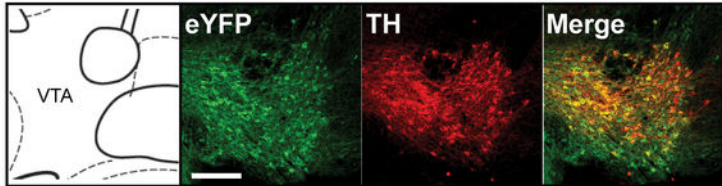

# Supplemental Figure-3 (Han)

eYFP control

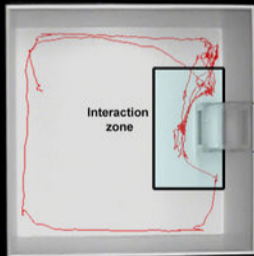

ChR2 phasic

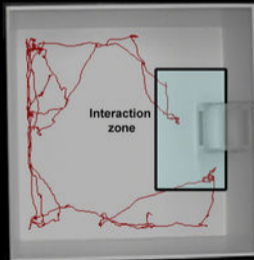

# Supplemental Figure-4 (Han)

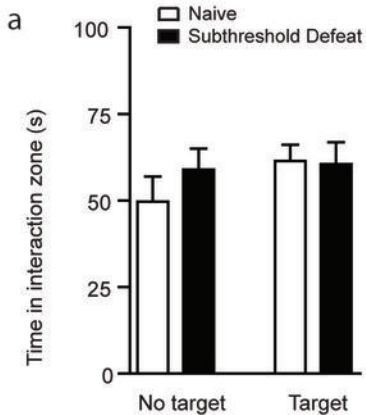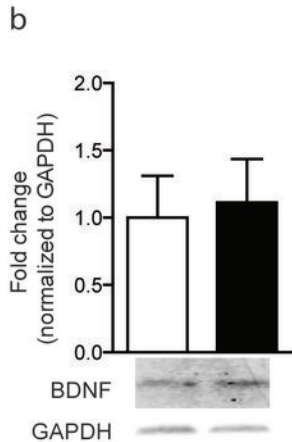

# Supplemental Figure-5 (Han)

a

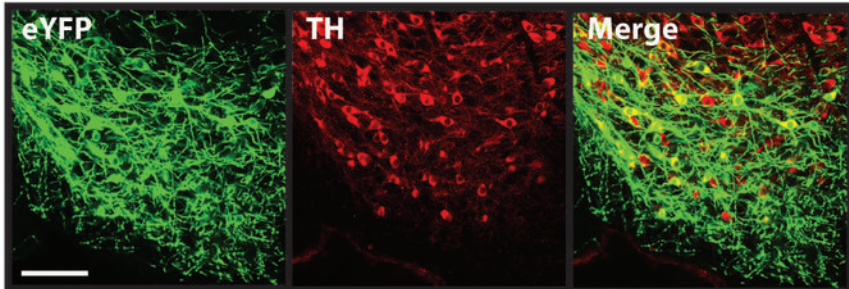

b

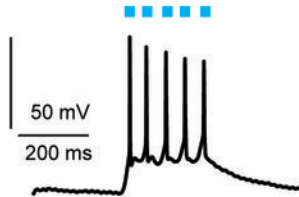



# Supplemental Figure-7 (Han)

a C57BL/6J - stress-naive mice

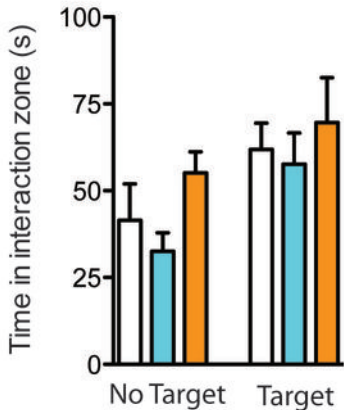

b

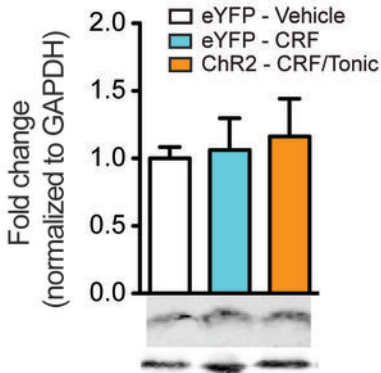

# Supplemental Figure-6 (Han)

a C57BL/6J - stressed mice

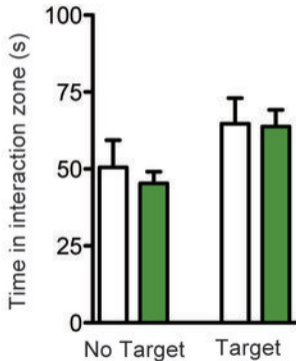

b

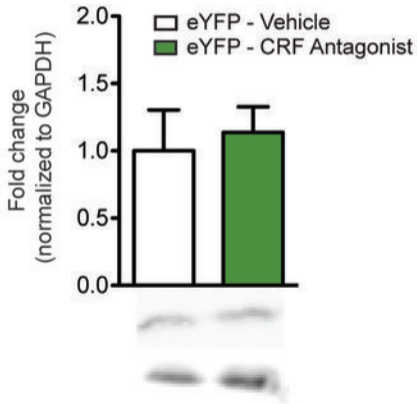

# Supplemental Figure-8 (Han)

a

Stress Phasic  
(CRF) firing

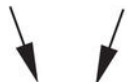

Gating

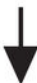

BDNF  
up-regulation

b

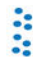

BDNF

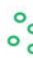

CRF

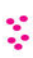

Dopamine

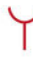

TrkB  
receptor

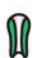

CRF  
receptor

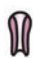

Dopamine  
receptor

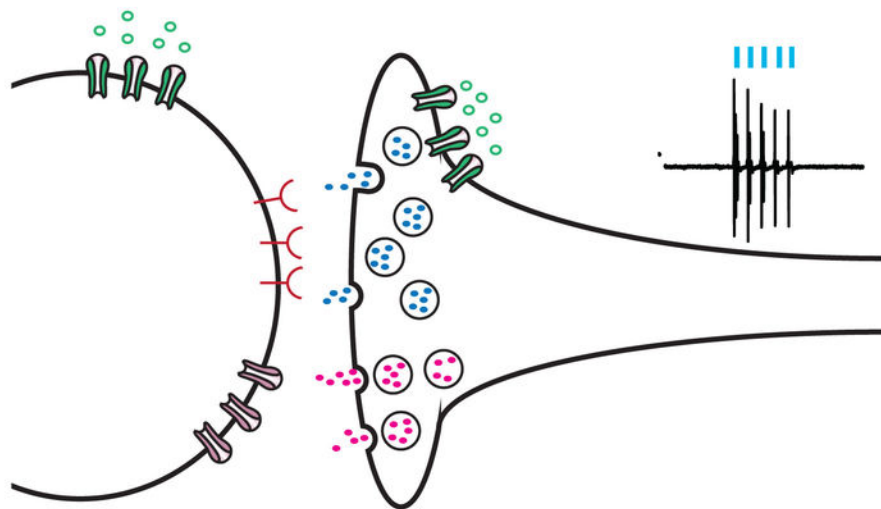

NAc

Medium Spiny Neuron

VTA

Dopamine Neuron
